# Supplementary material for: Cross-Reactivity of SARS-CoV-2 Nucleocapsid-Binding Antibodies and Its Implication for COVID-19 Serology Tests
Source: MDPI journal article supplement (doi:10.3390/v14092041), 2022-09-14
Supplement: s1 [file s1]

## Supplementary Materials

**Table S1.** Demographic characteristics of the study subjects

| Nº | Sex | Age | Date of disease onset | SARS-CoV-2 lineage† | Severity | Month PSO |
|----|-----|-----|-----------------------|---------------------|----------|-----------|
| 1  | F   | 31  | May 2020              | B.1                 | severe   | 7         |
| 2  | F   | 31  | May 2020              | B.1                 | severe   | 18        |
| 3  | M   | 39  | May 2020              | B.1                 | severe   | 4         |
| 4  | M   | 39  | May 2020              | B.1                 | severe   | 11        |
| 5  | M   | 39  | May 2020              | B.1                 | severe   | 16        |
| 6  | F   | 34  | May 2020              | B.1                 | mild     | 7         |
| 7  | F   | 40  | June 2020             | B.1                 | mild     | 6         |
| 8  | M   | 38  | Sep 2020              | B.1                 | moderate | 2         |
| 9  | F   | 33  | Oct 2020              | B.1                 | moderate | 6         |
| 10 | F   | 33  | Oct 2020              | B.1                 | moderate | 9         |
| 11 | F   | 33  | Oct 2020              | B.1                 | moderate | 11        |
| 12 | F   | 77  | Oct 2020              | B.1                 | moderate | 1         |
| 13 | F   | 77  | Oct 2020              | B.1                 | moderate | 6         |
| 14 | F   | 77  | Oct 2020              | B.1                 | moderate | 11        |
| 15 | F   | 39  | Nov 2020              | B.1                 | mild     | 6         |
| 16 | M   | 39  | Dec 2020              | B.1                 | moderate | 1         |
| 17 | M   | 39  | Dec 2020              | B.1                 | moderate | 5         |
| 18 | M   | 39  | Dec 2020              | B.1                 | moderate | 7         |
| 19 | F   | 39  | Dec 2020              | B.1                 | mild     | 5         |
| 20 | F   | 39  | Feb 2021              | B.1                 | mild     | 1         |
| 21 | F   | 39  | Feb 2021              | B.1                 | mild     | 6         |
| 22 | F   | 80  | Feb 2021              | B.1                 | moderate | 7         |
| 23 | M   | 84  | Feb 2021              | B.1                 | severe   | 7         |
| 24 | F   | 64  | May 2021              | B.1.617.2           | mild     | 1         |
| 25 | F   | 37  | May 2021              | B.1.617.2           | mild     | 4         |
| 26 | M   | 37  | May 2021              | B.1.617.2           | moderate | 4         |
| 27 | F   | 45  | May 2021              | B.1.617.2           | mild     | 1         |
| 28 | M   | 26  | Aug 2021              | B.1.617.2           | mild     | 1         |
| 29 | M   | 31  | Aug 2021              | B.1.617.2           | mild     | 1         |
| 30 | F   | 38  | Sep 2021              | B.1.617.2           | mild     | 1         |
| 31 | M   | 31  | Oct 2021              | B.1.617.2           | mild     | 1         |
| 32 | F   | 35  | Oct 2021              | B.1.617.2           | mild     | 1         |

† the B.1 (Wuhan D614G) lineage was assigned based on the surveillance data [1], while B.1.617.2 (Delta) lineage assignment was based on the sequencing of Spike protein gene of the RT-PCR positive specimens or recovered live viruses.

PSO – post symptoms onset.

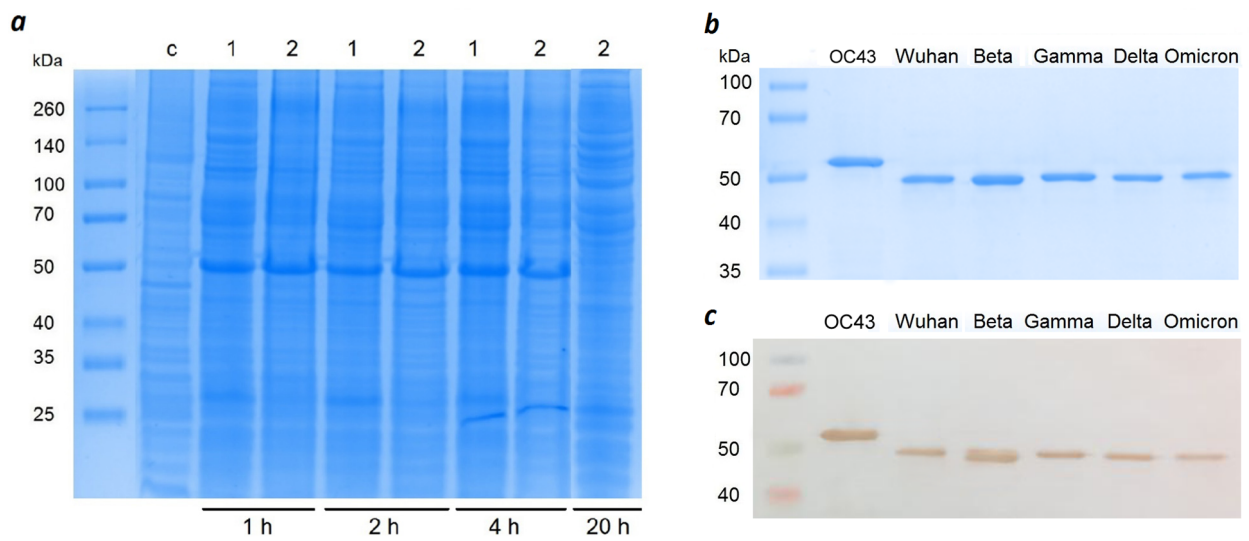

**Figure S1.** Induction and purification of recombinant N proteins. (a) SDS-PAGE analysis of different IPTG concentrations and induction time on the expression intensity of N protein (B.1) at 37 °C (1, 0.1 mM IPTG; 2, 0.5 mM IPTG); (b) SDS-PAGE analysis of N proteins purified by IMAC under non-reducing conditions; (c) Western blot analysis of obtained proteins with HisProbe-HRP. M - molecular weight marker.

## A

|               |            |            |            |            |            |                                                                     |            |             |            |
|---------------|------------|------------|------------|------------|------------|---------------------------------------------------------------------|------------|-------------|------------|
| 10            | 20         | 30         | 40         | 50         | 60         | 70                                                                  | 80         | 90          | 100        |
| 1: MGSSHHHHHH | SQDQMSDNGP | QNQRNAPRIT | FGGPSDSTGS | NQNGERSGAR | SKQRRPQGLP | NNTASWFTAL                                                          | TQHGKEDLKF | PRGQGVPIINT | NSSPDDQIGY |
| 2: MGSSHHHHHH | SQDQMSDNGP | QNQRNAPRIT | FGGPSDSTGS | NQNGERSGAR | SKQRRPQGLP | NNTASWFTAL                                                          | TQHGKEDLKF | PRGQGVPIINT | NSSPDDQIGY |
| 3: MGSSHHHHHH | SQDQMSDNGP | QNQRNAPRIT | FGGPSDSTGS | NQNGERSGAR | SKQRRPQGLP | NNTASWFTAL                                                          | TQHGKEDLKF | PRGQGVPIINT | NSSPDDQIGY |
| 4: MGSSHHHHHH | SQDQMSDNGP | QNQRNAPRIT | FGGPSDSTGS | NQNGERSGAR | SKQRRPQGLP | NNTASWFTAL                                                          | TQHGKEDLKF | PRGQGVPIINT | NSSPDDQIGY |
| 5: MGSSHHHHHH | SQDQMSDNGP | QNQRNAPRIT | FGGPSDSTGS | NQNGERSGAR | SKQRRPQGLP | NNTASWFTAL                                                          | TQHGKEDLKF | PRGQGVPIINT | NSSPDDQIGY |
| 110           | 120        | 130        | 140        | 150        | 160        | 170                                                                 | 180        | 190         | 200        |
| YRRATRIRRG    | GDGKMKDLSP | RWYFYLLGTG | PEAGLPYGAN | KDGIWVATE  | GALNTPKDHI | GTRNPANNA                                                           | IVLQLPQGT  | LPGFYAEGS   | RGGSQASSRS |
| YRRATRIRRG    | GDGKMKDLSP | RWYFYLLGTG | PEAGLPYGAN | KDGIWVATE  | GALNTPKDHI | GTRNPANNA                                                           | IVLQLPQGT  | LPGFYAEGS   | RGGSQASSRS |
| YRRATRIRRG    | GDGKMKDLSP | RWYFYLLGTG | PEAGLPYGAN | KDGIWVATE  | GALNTPKDHI | GTRNPANNA                                                           | IVLQLPQGT  | LPGFYAEGS   | RGGSQASSRS |
| YRRATRIRRG    | GDGKMKDLSP | RWYFYLLGTG | PEAGLPYGAN | KDGIWVATE  | GALNTPKDHI | GTRNPANNA                                                           | IVLQLPQGT  | LPGFYAEGS   | RGGSQASSRS |
| YRRATRIRRG    | GDGKMKDLSP | RWYFYLLGTG | PEAGLPYGAN | KDGIWVATE  | GALNTPKDHI | GTRNPANNA                                                           | IVLQLPQGT  | LPGFYAEGS   | RGGSQASSRS |
| 210           | 220        | 230        | 240        | 250        | 260        | 270                                                                 | 280        | 290         | 300        |
| SSRSRNSSRN    | STPGSSRGTS | PARMAGNGGD | AALALLLLDR | LNQLESKMSG | KGQQQQGQTV | TKKSAAEASK                                                          | KPRQKRTATK | AYNVTQAFGR  | RGPEQTQGNF |
| SSRSRNSSRN    | STPGSSRGTS | PARMAGNGGD | AALALLLLDR | LNQLESKMSG | KGQQQQGQTV | TKKSAAEASK                                                          | KPRQKRTATK | AYNVTQAFGR  | RGPEQTQGNF |
| SSRSRNSSRN    | STPGSSRGTS | PARMAGNGGD | AALALLLLDR | LNQLESKMSG | KGQQQQGQTV | TKKSAAEASK                                                          | KPRQKRTATK | AYNVTQAFGR  | RGPEQTQGNF |
| SSRSRNSSRN    | STPGSSRGTS | PARMAGNGGD | AALALLLLDR | LNQLESKMSG | KGQQQQGQTV | TKKSAAEASK                                                          | KPRQKRTATK | AYNVTQAFGR  | RGPEQTQGNF |
| SSRSRNSSRN    | STPGSSRGTS | PARMAGNGGD | AALALLLLDR | LNQLESKMSG | KGQQQQGQTV | TKKSAAEASK                                                          | KPRQKRTATK | AYNVTQAFGR  | RGPEQTQGNF |
| 310           | 320        | 330        | 340        | 350        | 360        | 370                                                                 | 380        | 390         | 400        |
| GDQELIRQGT    | DYKHWPQIAQ | FAPSASAFFG | MSRIGMEVTP | SGTWLTYTGA | IKLDDKDPNF | KDQVILLNKH                                                          | IDAYKTFFPT | EPKDKKKKA   | DETQALPQRQ |
| GDQELIRQGT    | DYKHWPQIAQ | FAPSASAFFG | MSRIGMEVTP | SGTWLTYTGA | IKLDDKDPNF | KDQVILLNKH                                                          | IDAYKTFFPT | EPKDKKKKA   | DETQALPQRQ |
| GDQELIRQGT    | DYKHWPQIAQ | FAPSASAFFG | MSRIGMEVTP | SGTWLTYTGA | IKLDDKDPNF | KDQVILLNKH                                                          | IDAYKTFFPT | EPKDKKKKA   | DETQALPQRQ |
| GDQELIRQGT    | DYKHWPQIAQ | FAPSASAFFG | MSRIGMEVTP | SGTWLTYTGA | IKLDDKDPNF | KDQVILLNKH                                                          | IDAYKTFFPT | EPKDKKKKA   | DETQALPQRQ |
| GDQELIRQGT    | DYKHWPQIAQ | FAPSASAFFG | MSRIGMEVTP | SGTWLTYTGA | IKLDDKDPNF | KDQVILLNKH                                                          | IDAYKTFFPT | EPKDKKKKA   | DETQALPQRQ |
| 410           | 420        | 430        |            |            |            |                                                                     |            |             |            |
| KKQQTVTLLP    | AADLDDFSKQ | LQSMSSADS  | TQAHHHHHH  | Cov        | Score      | 1 – hCoV-19/Russia/StPetersburg-3524/2020 (B.1 Lineage, Wuhan)      |            |             |            |
| KKQQTVTLLP    | AADLDDFSKQ | LQSMSSADS  | TQAHHHHHH  | 87%        | 330 / 70   | 2 – hCoV-19/Russia/SPE-RII-27029S/2021 (B.1.351 Lineage, Beta)      |            |             |            |
| KKQQTVTLLP    | AADLDDFSKQ | LQSMSSADS  | TQAHHHHHH  | 85%        | 243 / 70   | 3 – hCoV-19/Japan/TY7-503/2021 (P.1 Lineage, Gamma)                 |            |             |            |
| KKQQTVTLLP    | AADLDDFSKQ | LQSMSSADS  | TQAHHHHHH  | 72%        | 339 / 70   | 4 – hCoV-19/Russia/SPE-RII-32759S/2021 (B.1.617.2 Lineage, Delta)   |            |             |            |
| KKQQTVTLLP    | AADLDDFSKQ | LQSMSSADS  | TQAHHHHHH  | 71%        | 238 / 70   | 5 – hCoV-19/Russia/SPE-RII-6243V1/2021 (B.1.1.529 Lineage, Omicron) |            |             |            |
| KKQQTVTLLP    | AADLDDFSKQ | LQSMSSADS  | TQAHHHHHH  | 86%        | 267 / 70   | S – hCoV_OC43                                                       |            |             |            |

## B

|               |            |            |            |             |            |             |            |             |            |
|---------------|------------|------------|------------|-------------|------------|-------------|------------|-------------|------------|
| 10            | 20         | 30         | 40         | 50          | 60         | 70          | 80         | 90          | 100        |
| 1: MGSSHHHHHH | SQDQMS     | -----D     | NGPQNQRNAP | RIITFGGPSDS | TGSNQNGERS | GARSQRRPQ   | GLPNNTASWF | TALTQHGK-E  | DLKFPRGQGV |
| S: MGSSHHHHHH | SQDQMS     | FTPG       | KQSSSRASSG | NRSNGILKW   | ADQSDQVRNV | QTRGRRAQPK  | QTATSQQPSG | GNVVPYYSWF  | SGITQFQKKG |
| 110           | 120        | 130        | 140        | 150         | 160        | 170         | 180        | 190         | 200        |
| PINTNSSPDD    | QIGYYRRATR | R-IRGGDGKM | KDLSRPRWYF | YLGTPGEAGL  | PYGANKDGI  | WVATEGA-LN  | TPKDHIHTRN | PANNAIVLQ   | LPQGTTLPGK |
| PIAPGVPATE    | AKGYWYRHR  | RSFKTADGNQ | RQLLPRWYF  | YLGTPGPHAKD | QYGTIDIGVY | WVASNQADV   | TPAD-IVDRD | PSSDEAIPTR  | FPPGTVLPGQ |
| 210           | 220        | 230        | 240        | 250         | 260        | 270         | 280        | 290         | 300        |
| FYAEGS----    | -----RGGS  | QASSRSSRS  | RNSSRNSTPG | SSRGTSPTM   | AGNGGDAALA | LLLLDLRLNQL | ESKMSGKQQQ | QQGQTVTKKS  | AAEASK---- |
| YYIEGSGRSA    | PNSRSTSRIS | SRASSAGRS  | RANSNRTPT  | S--GVTPD-M  | ADQ-----IA | SLVLAKLGKD  | ATK-----   | --PQVTKHT   | AKEVRQKILN |
| 310           | 320        | 330        | 340        | 350         | 360        | 370         | 380        | 390         | 400        |
| KPRQKRTATK    | AYNVTQAFGR | RGPEQTQGNF | GDQELIRQGT | DYKHWPQIAQ  | FAPSASAFFG | MSRIGM----  | -----EVT   | PSGTWLTYTGA | AIKLDDKDPN |
| KPRQKRSQNK    | QCTVQCFQK  | RGPNQ---NF | GGGEMLKLGT | SDPQFPILAE  | LAPTAGAFF  | GSRLAKLVQ   | NLSGNPDPEQ | KDVEYLRYNG  | AIRFDSTLSG |
| 410           | 420        | 430        | 440        | 450         | 460        | 470         | 480        |             |            |
| FKDQVILLNK    | HIDAYKTFFP | TEPKDKKKK  | ADETQALPQR | QKQQTVTLL   | PAADLDDFSK | QLQSMSSAD   | STQA-----  | -----HHHHHH | Cov        |
| FETIMKVLNE    | NLNAYQODG  | MMNMSPKQR  | QRGHKNGQGE | NDNISVAVPK  | SRVQNKRSRE | LTAEDISLLK  | KMDEPYTEDT | SEIHHHHHH   | Score      |
|               |            |            |            |             |            |             |            |             | 79%        |
|               |            |            |            |             |            |             |            |             | 316 / 70   |

**Figure S2.** Comparison of amino acid sequences of recombinant N proteins based on the results of mass spectrometric study. **A.** Alignment of five sequences of SARS-CoV-2 strains used in the study. **B.** Comparison of the N proteins sequences of B.1 SARS-CoV-2 (1) and a seasonal OC43 (S) coronavirus. Identified amino acid residues are marked in red. Yellow and blue colors indicate residues that differ in the analyzed proteins. Areas that distinguish at least one of the proteins are marked in bold red, and unique regions allowing to unambiguously identify the proteins are underlined. Unique regions that distinguish the N proteins of SARS-CoV-2 and OC43 viruses are shown in frames. Coverage and identification score (value/threshold) for each protein are indicated; the identification is considered reliable ( $p < 0.05$ ) if the score exceeds the threshold.

**A**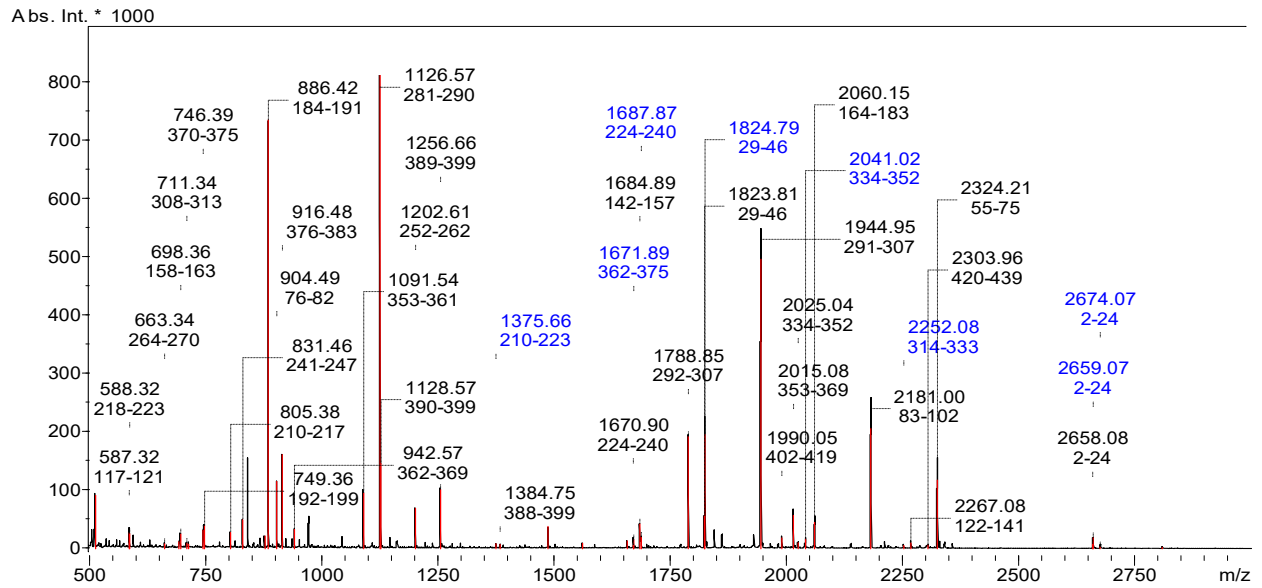**B**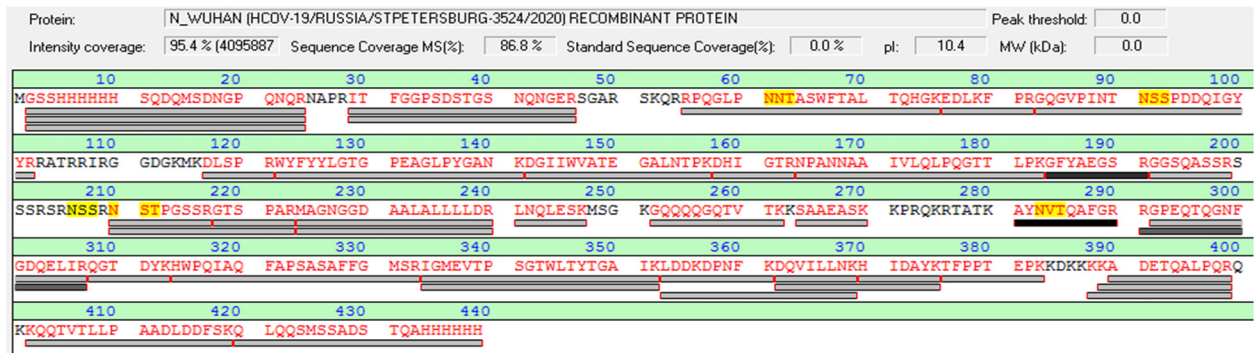

**Figure S3.** Mass spectrometry analysis of N protein (B.1). **A.** Fragment of MALDI mass spectrum of hydrolyzed protein. Ions associated with fragments of the amino acid sequence (hCoV-19/Russia/StPetersburg-3524/2020) and the corresponding ranges are indicated; **B.** The amino acid sequence of protein: the fragments found in the spectrum are marked in red, gray underlined regions are matched with registered ions.



**A**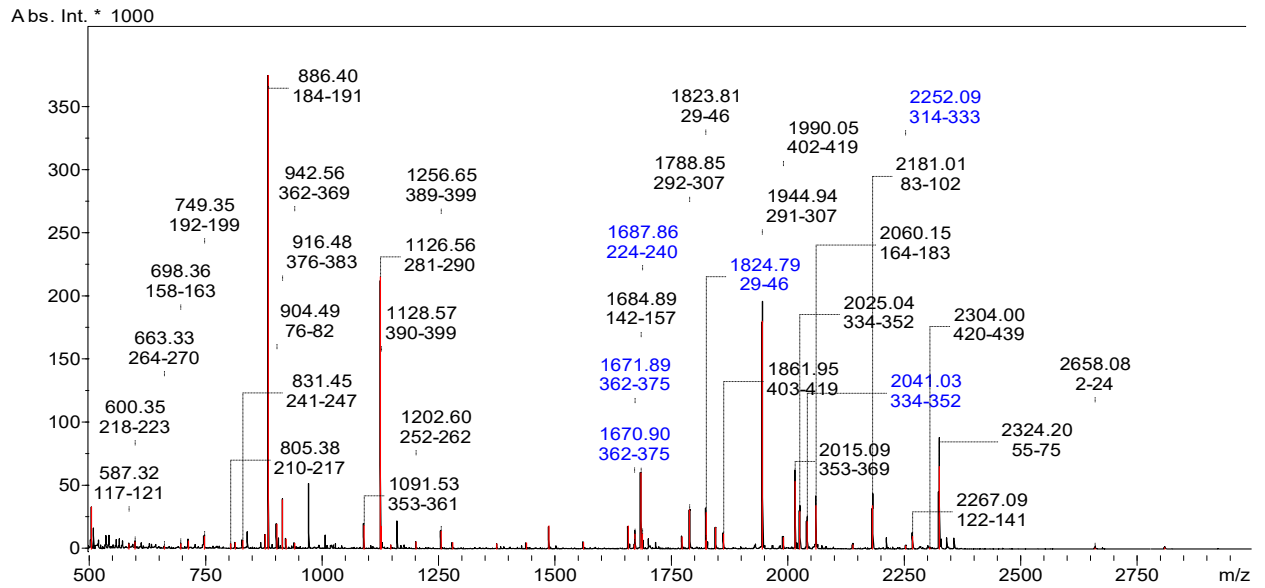**B**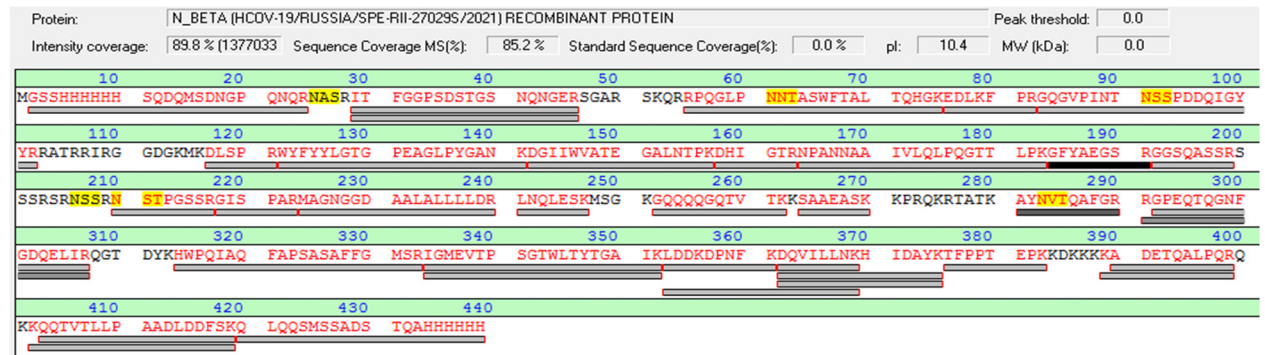

**Figure S4.** Mass spectrometry analysis of N protein (B.1.351). **A.** Fragment of MALDI mass spectrum of hydrolyzed protein. Ions associated with fragments of the amino acid sequence (hCoV-19/Russia/SPE-R11-27029S/2021) and the corresponding ranges are indicated; **B.** The amino acid sequence of protein: the fragments found in the spectrum are marked in red, gray underlined regions are matched with registered ions.

**A**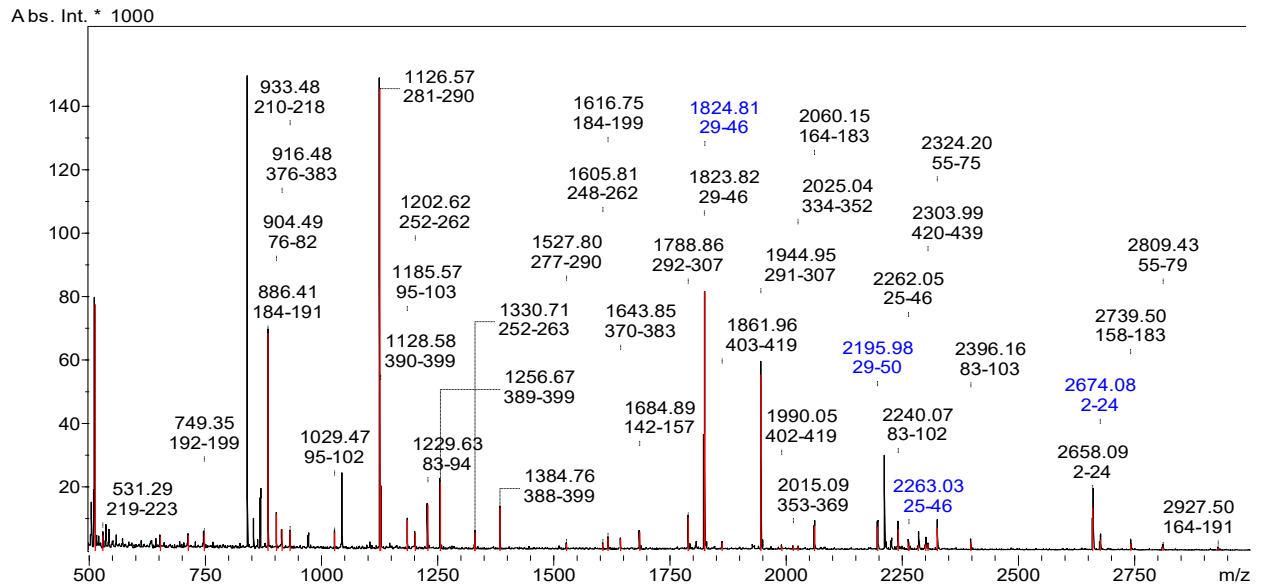**B**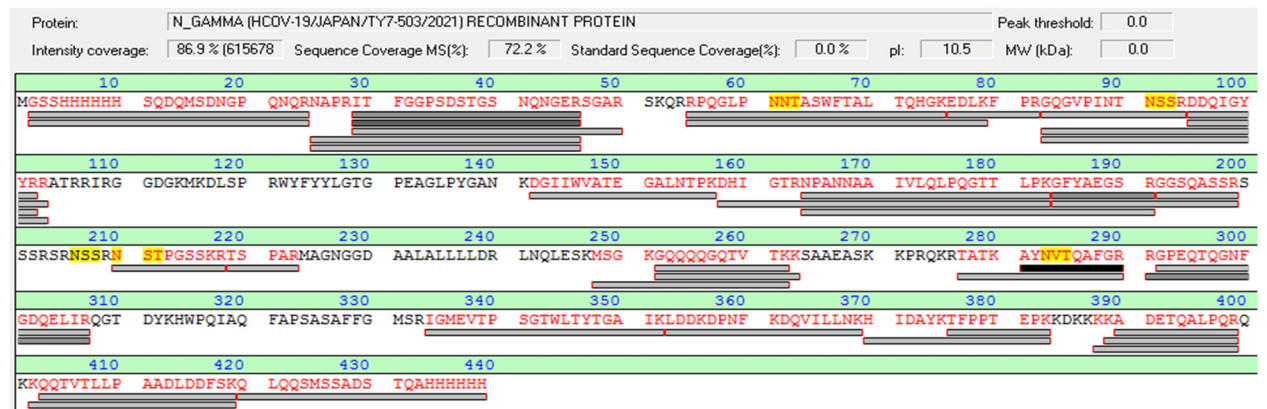

**Figure S5.** Mass spectrometry analysis of N protein (P.1). **A.** Fragment of MALDI mass spectrum of hydrolyzed protein. Ions associated with fragments of the amino acid sequence (hCoV-19/Japan/TY7-503/2021) and the corresponding ranges are indicated; **B.** The amino acid sequence of protein: the fragments found in the spectrum are marked in red, gray underlined regions are matched with registered ions.

A

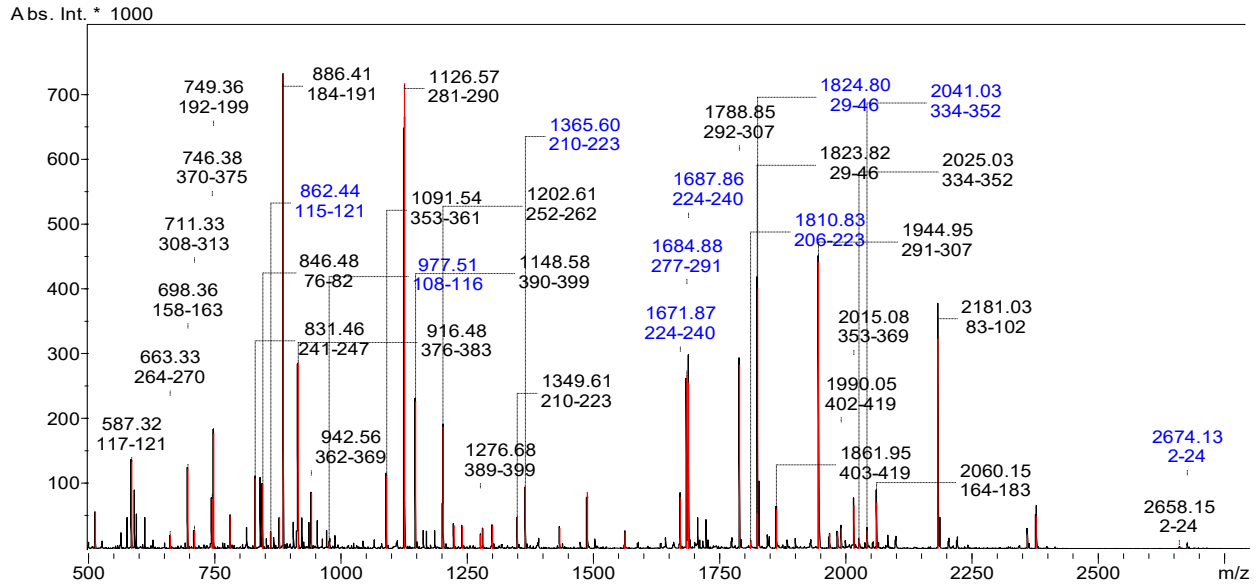

B

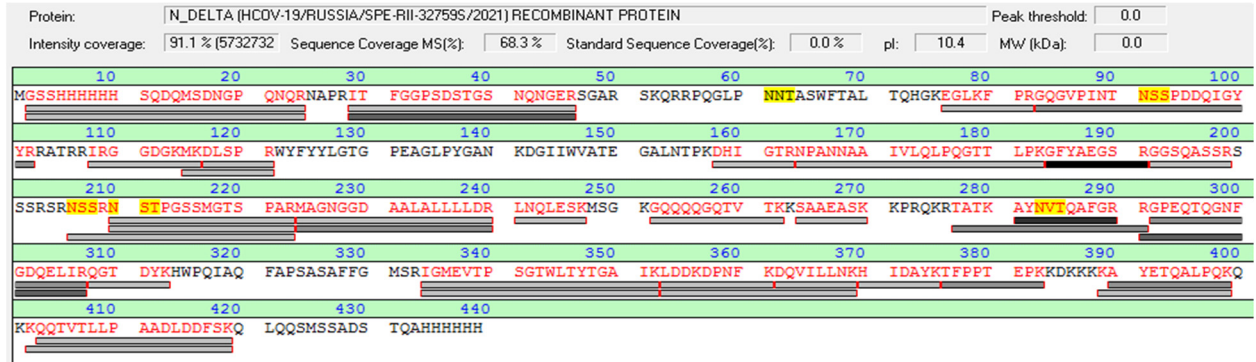

**Figure S6.** Mass spectrometry analysis of N protein (B.1.617.2). **A.** Fragment of MALDI mass spectrum of hydrolyzed protein. Ions associated with fragments of the amino acid sequence (hCoV-19/Russia/SPE-RII-32759S/2021) and the corresponding ranges are indicated; **B.** The amino acid sequence of protein: the fragments found in the spectrum are marked in red, gray underlined regions are matched with registered ions.

A

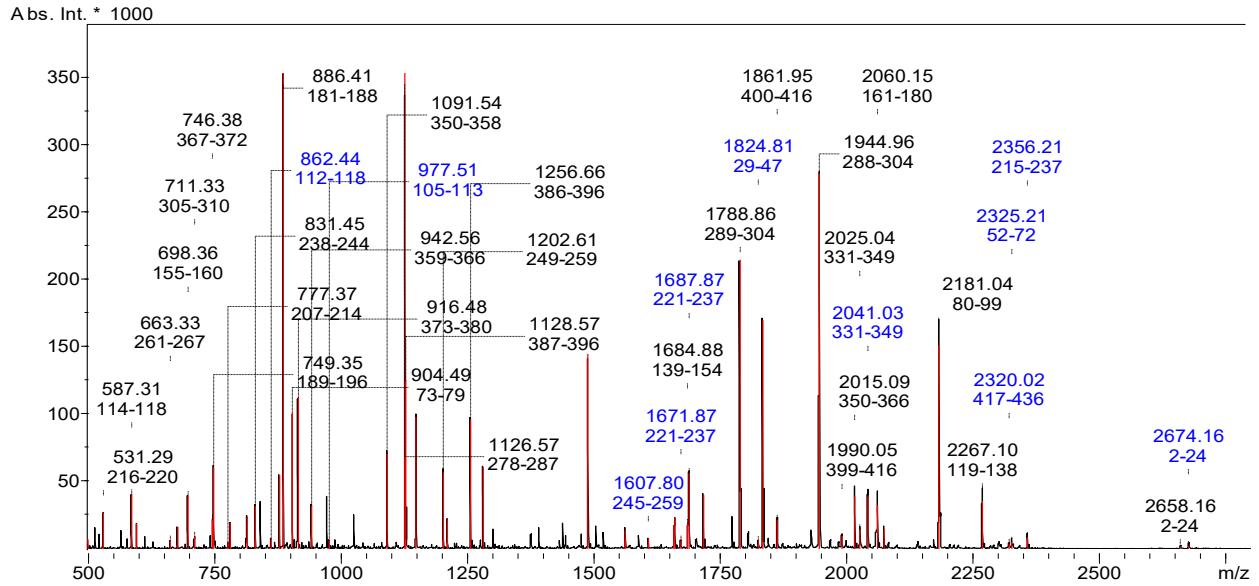

B

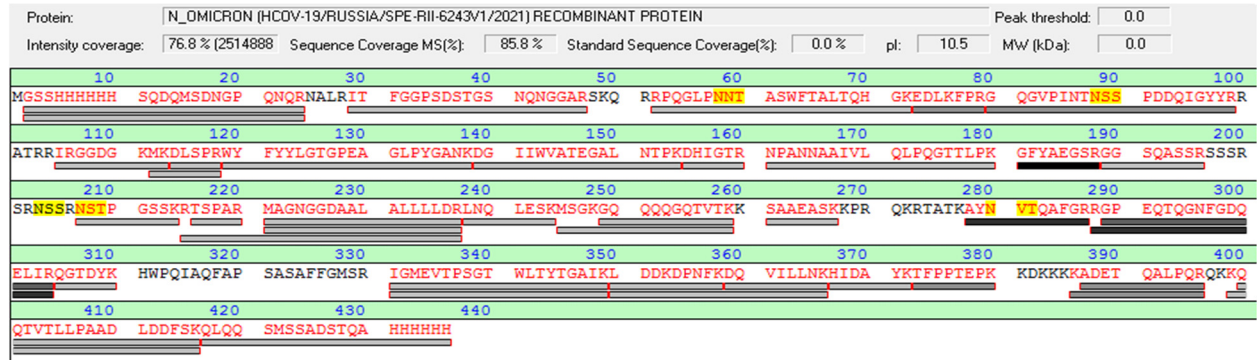

**Figure S7.** Mass spectrometry analysis of N protein (B.1.1.529). **A.** Fragment of MALDI mass spectrum of hydrolyzed protein. Ions associated with fragments of the amino acid sequence (hCoV-19/Russia/SPE-RII-6243V1/2021) and the corresponding ranges are indicated; **B.** The amino acid sequence of protein: the fragments found in the spectrum are marked in red, gray underlined regions are matched with registered ions.



**A**

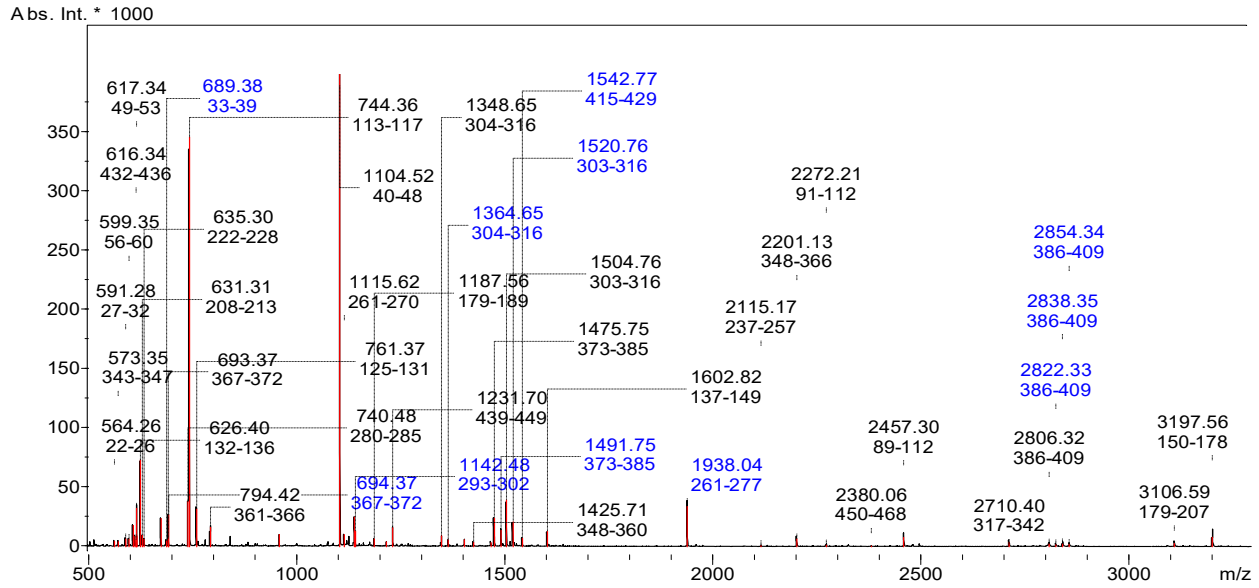

**B**

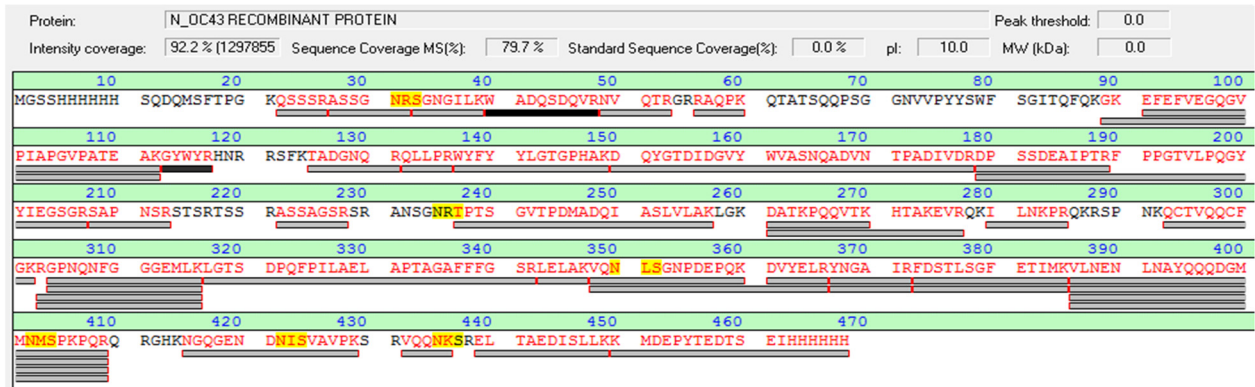

**Figure S8.** Mass spectrometry analysis of N protein (HCoV OC43). **A.** Fragment of MALDI mass spectrum of hydrolyzed protein. Ions associated with fragments of the amino acid sequence (OC43) and the corresponding ranges are indicated; **B.** The amino acid sequence of protein: the fragments found in the spectrum are marked in red, gray underlined regions are matched with registered ions.

**Table S2.** Detected ions (MH<sup>+</sup>) and matched peptides from the recombinant N protein (B.1) according to peptide mapping. The range of residues corresponding to the peptides, the relative intensity of the ion, the mass deviation (in parts per million, ppm), as well as possible peptide modifications (oxidation and deamidation) are indicated. Peptides that differ in at least one of the studied N proteins are marked in red, and unique peptides for this recombinant proteins are marked in bold red.

| MH <sup>+</sup> | Intensity (RU)   | Mass deviation (ppm) | Range of residues | Matched peptide                                      |
|-----------------|------------------|----------------------|-------------------|------------------------------------------------------|
| 587.31          | 27512.69         | 11.37                | 117 - 121         | DLSPR                                                |
| <b>588.31</b>   | <b>25817.61</b>  | <b>9.47</b>          | <b>218 - 223</b>  | <b>GTSPAR</b>                                        |
| 663.33          | 8914.68          | 12.56                | 264 - 270         | SAAEASK                                              |
| 698.36          | 25481.97         | 6.72                 | 158 - 163         | DHIGTR                                               |
| 711.33          | 9493.81          | 10.66                | 308 - 313         | QGTDYK                                               |
| 746.38          | 31731.21         | 6.74                 | 370 - 375         | HIDAYK                                               |
| 749.35          | 39593.38         | 3.67                 | 192 - 199         | GGSQASSR                                             |
| <b>805.38</b>   | <b>28000.48</b>  | <b>1.61</b>          | <b>210 - 217</b>  | <b>NSTPGSSR</b>                                      |
| 831.46          | 49533.04         | 6.3                  | 241 - 247         | LNQLESK                                              |
| 886.41          | 733180.94        | 12.52                | 184 - 191         | GFYAEGSR                                             |
| <b>904.49</b>   | <b>115198.42</b> | <b>4.06</b>          | <b>76 - 82</b>    | <b>EDLKFPK</b>                                       |
| 916.48          | 160751.78        | 7.68                 | 376 - 383         | TFPTEPK                                              |
| 942.56          | 33435.58         | 3.63                 | 362 - 369         | DQVILLNK                                             |
| 1091.54         | 95118.6          | 4.06                 | 353 - 361         | LDDKDPNFK                                            |
| 1126.56         | 830947.64        | 5.7                  | 281 - 290         | AYNVTQAFGR                                           |
| <b>1128.56</b>  | <b>145732.46</b> | <b>5.78</b>          | <b>390 - 399</b>  | <b>ADETQALPQR</b>                                    |
| 1202.61         | 69095.96         | -4.59                | 252 - 262         | GQQQQGQTVTK                                          |
| <b>1256.66</b>  | <b>101407.45</b> | <b>-0.38</b>         | <b>389 - 399</b>  | <b>KADETQALPQR</b>                                   |
| <b>1375.66</b>  | <b>8647.57</b>   | <b>-0.21</b>         | <b>210 - 223</b>  | <b>NSTPGSSRGTSAPAR 1: Deamidated (NQ)</b>            |
| <b>1384.75</b>  | <b>7247.41</b>   | <b>-1.36</b>         | <b>388 - 399</b>  | <b>KKADETQALPQR</b>                                  |
| 1670.89         | 6429             | 6.47                 | 224 - 240         | MAGNGGDAALALLLDR                                     |
| 1671.9          | 15410.38         | -5.26                | 362 - 375         | DQVILLNKHIDAYK 2: Deamidated (NQ) 7: Deamidated (NQ) |
| 1684.89         | 42657.95         | 1.67                 | 142 - 157         | DGIWVATEGALNTPK                                      |
| 1687.87         | 19729.67         | -1.68                | 224 - 240         | MAGNGGDAALALLLDR 1: Oxidation (M) 4: Deamidated (NQ) |
| 1788.85         | 192022.96        | 1.82                 | 292 - 307         | GPEQTQGNFGDQELIR                                     |
| <b>1823.82</b>  | <b>56772</b>     | <b>-5.18</b>         | <b>29 - 46</b>    | <b>ITFGGPSDSTGSNQNGER</b>                            |
| <b>1824.8</b>   | <b>195305.65</b> | <b>-5.61</b>         | <b>29 - 46</b>    | <b>ITFGGPSDSTGSNQNGER 13: Deamidated (NQ)</b>        |
| 1944.95         | 495320.52        | -1.67                | 291 - 307         | RGPEQTQGNFGDQELIR                                    |
| 1990.05         | 18602.11         | 0.26                 | 402 - 419         | KQQTVTLLPAADLDDFSK                                   |
| 2015.08         | 57246.82         | -1.74                | 353 - 369         | LDDKDPNFKDQVILLNK                                    |
| 2025.04         | 10393.14         | 0.49                 | 334 - 352         | IGMEVTPSGTWLTYTGAIK                                  |
| 2041.03         | 16691.14         | -5.29                | 334 - 352         | IGMEVTPSGTWLTYTGAIK 3: Oxidation (M)                 |
| 2060.15         | 45208.99         | -0.72                | 164 - 183         | NPANNAAIVLQLPQGTTLPK                                 |
| <b>2181.02</b>  | <b>205942.06</b> | <b>-7.23</b>         | <b>83 - 102</b>   | <b>GQGVPIINTNSSPDDQIGYYR</b>                         |

|                |             |               |                  |                                             |
|----------------|-------------|---------------|------------------|---------------------------------------------|
| 2252.07        | 5949.45     | 3.89          | 314 - 333        | HWPQIAQFAPSASAFFGMSR 18: Oxidation (M)      |
| 2267.08        | 10286.59    | 1.87          | 122 - 141        | WYFYLLGTGPEAGLPYGANK                        |
| <b>2304.01</b> | <b>6300</b> | <b>-19.61</b> | <b>420 - 439</b> | <b>QLQQSMSSADSTQAHHHHHH</b>                 |
| 2324.19        | 117640.71   | 8.28          | 55 - 75          | RPQGLPNNTASWFTALTQHGK                       |
| 2658.11        | 8524        | -11.62        | 2 - 24           | GSSHHHHHHSQDQMSDNGPQNQR                     |
| 2659.09        | 18997       | -9.85         | 2 - 24           | GSSHHHHHHSQDQMSDNGPQNQR 11: Deamidated (NQ) |
| 2674.11        | 3614        | -14.13        | 2 - 24           | GSSHHHHHHSQDQMSDNGPQNQR 14: Oxidation (M)   |

**Table S3** - Detected ions (MH<sup>+</sup>) and matched peptides from the recombinant N protein (B.1.351) according to peptide mapping. The range of residues corresponding to the peptides, the relative intensity of the ion, the mass deviation (in parts per million, ppm), as well as possible peptide modifications (oxidation and deamidation) are indicated. Peptides that differ in at least one of the studied N proteins are marked in red, and unique peptides for this recombinant proteins are marked in bold red.

| MH <sup>+</sup> | Intensity (RU)  | Mass deviation (ppm) | Range of residues | Sequence                                              |
|-----------------|-----------------|----------------------|-------------------|-------------------------------------------------------|
| 587.31          | 4137.63         | 2.93                 | 117 - 121         | DLSPR                                                 |
| <b>600.35</b>   | <b>5917.54</b>  | <b>3.05</b>          | <b>218 - 223</b>  | <b>GISPAR</b>                                         |
| 663.33          | 2329            | 3.04                 | 264 - 270         | SAAEASK                                               |
| 698.36          | 4479.49         | -0.38                | 158 - 163         | DHIGTR                                                |
| 749.35          | 10225.64        | -1.96                | 192 - 199         | GGSQASSR                                              |
| <b>805.38</b>   | <b>4407.71</b>  | <b>-1.79</b>         | <b>210 - 217</b>  | <b>NSTPGSSR</b>                                       |
| 831.46          | 6944.56         | -3.12                | 241 - 247         | LNQLESK                                               |
| 886.41          | 390911.05       | -2.2                 | 184 - 191         | GFYAEGSR                                              |
| <b>904.49</b>   | <b>19787.71</b> | <b>0.5</b>           | <b>76 - 82</b>    | <b>EDLKFPR</b>                                        |
| 916.48          | 38991.55        | -2.62                | 376 - 383         | TFPTEPK                                               |
| 942.56          | 4561.42         | -0.32                | 362 - 369         | DQVILLNK                                              |
| 1091.54         | 18783.54        | -4.54                | 353 - 361         | LDDKDPNFK                                             |
| 1126.56         | 215077.87       | -4.21                | 281 - 290         | AYNVTQAFGR                                            |
| <b>1128.56</b>  | <b>18023.5</b>  | <b>6.14</b>          | <b>390 - 399</b>  | <b>ADETQALPQR</b>                                     |
| 1202.61         | 5850.88         | -8.65                | 252 - 262         | GQQQQGQTVTK                                           |
| <b>1256.66</b>  | <b>14265.01</b> | <b>-5.78</b>         | <b>389 - 399</b>  | <b>KADETQALPQR</b>                                    |
| 1670.91         | 3870            | -4.73                | 362 - 375         | DQVILLNKHIDAYK 2: Deamidated (NQ)                     |
| 1671.9          | 12166.27        | -3.28                | 362 - 375         | DQVILLNKHIDAYK 2: Deamidated (NQ) 7: Deamidated (NQ)  |
| 1684.89         | 60314.71        | -2.75                | 142 - 157         | DGIWVATEGALNTPK                                       |
| 1687.87         | 12211.43        | -2.68                | 224 - 240         | MAGNGGDAALALLLDLR 1: Oxidation (M) 4: Deamidated (NQ) |
| 1788.85         | 31278.36        | -2.27                | 292 - 307         | GPEQTQGNFGDQELIR                                      |
| <b>1823.82</b>  | <b>6976</b>     | <b>-0.94</b>         | <b>29 - 46</b>    | <b>ITFGGPSDSTGSNQNGER</b>                             |
| <b>1824.8</b>   | <b>28961.85</b> | <b>-2.56</b>         | <b>29 - 46</b>    | <b>ITFGGPSDSTGSNQNGER 13: Deamidated (NQ)</b>         |
| 1861.95         | 12083.4         | -2.51                | 403 - 419         | QQTVTLLPAADLDDFSK                                     |
| 1944.95         | 180056.74       | -5.54                | 291 - 307         | RGPEQTQGNFGDQELIR                                     |
| 1990.05         | 9214.58         | -0.87                | 402 - 419         | KQQTVTLLPAADLDDFSK                                    |

|                |                 |              |                  |                                        |
|----------------|-----------------|--------------|------------------|----------------------------------------|
| 2015.08        | 53623.51        | 2.75         | 353 - 369        | LDDKDPNFKDQVILLNK                      |
| 2025.04        | 30090.62        | 0.06         | 334 - 352        | IGMEVTPSGTWLTYTGAIK                    |
| 2041.03        | 22198.44        | -2.68        | 334 - 352        | IGMEVTPSGTWLTYTGAIK 3: Oxidation (M)   |
| 2060.15        | 34543.96        | -0.75        | 164 - 183        | NPANNAIAIVLQLPQGTTLPK                  |
| <b>2181.02</b> | <b>34538.78</b> | <b>-4.81</b> | <b>83 - 102</b>  | <b>GQGVPIINTNSSPDDQIGYYR</b>           |
| 2252.07        | 2553.02         | 6.62         | 314 - 333        | HWPQIAQFAPSASAFFGMSR 18: Oxidation (M) |
| 2267.08        | 10035.9         | 2.33         | 122 - 141        | WYFYLLGTGPEAGLPYGANK                   |
| <b>2304.01</b> | <b>1250</b>     | <b>-1.06</b> | <b>420 - 439</b> | <b>QLQQSMSSADSTQAHHHHHH</b>            |
| 2324.19        | 65313.93        | 5.77         | 55 - 75          | RPQGLPNNTASWFTALTQHGK                  |
| 2658.11        | 1057            | -12.64       | 2 - 24           | GSSHHHHHHSQDQMSDNGPQNQR                |

**Table S4** - Detected ions (MH<sup>+</sup>) and matched peptides from the recombinant N protein (P.1) according to peptide mapping. The range of residues corresponding to the peptides, the relative intensity of the ion, the mass deviation (in parts per million, ppm), as well as possible peptide modifications (oxidation and deamidation) are indicated. Peptides that differ in at least one of the studied N proteins are marked in red, and unique peptides for this recombinant proteins are marked in bold red.

| MH <sup>+</sup> | Intensity (RU)  | Mass deviation (ppm) | Range of residues | Sequence                                      |
|-----------------|-----------------|----------------------|-------------------|-----------------------------------------------|
| <b>531.29</b>   | <b>4914.45</b>  | <b>3.81</b>          | <b>219 - 223</b>  | <b>TSPAR</b>                                  |
| 749.35          | 5600.24         | 0.23                 | 192 - 199         | GGSQASSR                                      |
| 886.41          | 68324.31        | 0.93                 | 184 - 191         | GFYAEGSR                                      |
| <b>904.49</b>   | <b>11590.49</b> | <b>3.49</b>          | <b>76 - 82</b>    | <b>EDLKFPK</b>                                |
| 916.48          | 6706.34         | 4.58                 | 376 - 383         | TFPPTPEPK                                     |
| <b>933.47</b>   | <b>6341.02</b>  | <b>2.08</b>          | <b>210 - 218</b>  | <b>NSTPGSSKR</b>                              |
| <b>1029.46</b>  | <b>5834.65</b>  | <b>2.06</b>          | <b>95 - 102</b>   | <b>DDQIGYYR</b>                               |
| 1126.56         | 145246.58       | 4.16                 | 281 - 290         | AYNVTQAFGR                                    |
| <b>1128.56</b>  | <b>20454.76</b> | <b>10.83</b>         | <b>390 - 399</b>  | <b>ADETQALPQR</b>                             |
| <b>1185.56</b>  | <b>9703.26</b>  | <b>4.26</b>          | <b>95 - 103</b>   | <b>DDQIGYYRR</b>                              |
| 1202.61         | 5605.11         | 4.04                 | 252 - 262         | GQQQQGQTVTK                                   |
| <b>1229.62</b>  | <b>14521.15</b> | <b>5.99</b>          | <b>83 - 94</b>    | <b>GQGVPIINTNSSR</b>                          |
| <b>1256.66</b>  | <b>21467.25</b> | <b>6.69</b>          | <b>389 - 399</b>  | <b>KADETQALPQR</b>                            |
| 1330.71         | 5722.49         | 4.46                 | 252 - 263         | GQQQQGQTVTKK                                  |
| <b>1384.75</b>  | <b>13517.71</b> | <b>3.92</b>          | <b>388 - 399</b>  | <b>KKADETQALPQR</b>                           |
| 1527.79         | 2245.15         | 4.54                 | 277 - 290         | TATKAYNVTQAFGR                                |
| 1605.8          | 2216.66         | 6.82                 | 248 - 262         | MSGKGQQQQGQTVTK                               |
| 1616.74         | 4199.39         | 3.83                 | 184 - 199         | GFYAEGSRGGSQASSR                              |
| 1643.84         | 3705.69         | 1.61                 | 370 - 383         | HIDAYKTFPPTPEPK                               |
| 1684.89         | 5885.92         | 1.25                 | 142 - 157         | DGIWVATEGALNTPK                               |
| 1788.85         | 10577.79        | 4.52                 | 292 - 307         | GPEQTQGNFGDQELIR                              |
| <b>1823.82</b>  | <b>36601</b>    | <b>2.45</b>          | <b>29 - 46</b>    | <b>ITFGGPSDSTGSNQNGER</b>                     |
| <b>1824.8</b>   | <b>81532</b>    | <b>6.82</b>          | <b>29 - 46</b>    | <b>ITFGGPSDSTGSNQNGER 13: Deamidated (NQ)</b> |

|         |          |        |           |                                            |
|---------|----------|--------|-----------|--------------------------------------------|
| 1861.95 | 2471.9   | 1.07   | 403 - 419 | QQTVTLLPAADLDDFSK                          |
| 1944.95 | 55336.74 | 0.62   | 291 - 307 | RGPEQTQGNFGDQELIR                          |
| 1990.05 | 1560.49  | -1.42  | 402 - 419 | KQQTVTLLPAADLDDFSK                         |
| 2015.08 | 1671     | 3.46   | 353 - 369 | LDDKDPNFKDQVILLNK                          |
| 2025.04 | 1452     | -0.23  | 334 - 352 | IGMEVTPSGTWLTYTGAIK                        |
| 2060.15 | 7809.62  | -1.11  | 164 - 183 | NPANNAAIVLQLPQGTTLPK                       |
| 2195.99 | 7738.64  | -4.31  | 29 - 50   | ITFGGPSDSTGSNQNGERSGAR 13: Deamidated (NQ) |
| 2240.07 | 6763.77  | 0.26   | 83 - 102  | <b>GQGVPIINTSSRDDQIGYYR</b>                |
| 2262.05 | 1649     | 0.84   | 25 - 46   | NAPRITFGGPSDSTGSNQNGER                     |
| 2263.03 | 2903.23  | -1.03  | 25 - 46   | NAPRITFGGPSDSTGSNQNGER 1: Deamidated (NQ)  |
| 2304.01 | 2247     | -6.29  | 420 - 439 | QLQQSMSSADSTQAHHHHHH                       |
| 2324.19 | 7252.47  | 5.37   | 55 - 75   | RPQGLPNNTASWFTALTQHGK                      |
| 2396.17 | 2686.4   | -5.64  | 83 - 103  | <b>GQGVPIINTSSRDDQIGYYR</b>                |
| 2658.11 | 13583.29 | -6.24  | 2 - 24    | GSSHHHHHHSQDQMSDNGPQNQR                    |
| 2674.11 | 3517.95  | -10.12 | 2 - 24    | GSSHHHHHHSQDQMSDNGPQNQR 14: Oxidation (M)  |
| 2739.49 | 2364.49  | 4.96   | 158 - 183 | DHIGTRNPANNAAIVLQLPQGTTLPK                 |
| 2809.44 | 1317.17  | -3.08  | 55 - 79   | <b>RPQGLPNNTASWFTALTQHGKEDLK</b>           |
| 2927.54 | 839.91   | -11.71 | 164 - 191 | NPANNAAIVLQLPQGTTLPKGFYAEGSR               |

**Table S5** - Detected ions (MH<sup>+</sup>) and matched peptides from the recombinant N protein (B.1.617.2) according to peptide mapping. The range of residues corresponding to the peptides, the relative intensity of the ion, the mass deviation (in parts per million, ppm), as well as possible peptide modifications (oxidation and deamidation) are indicated. Peptides that differ in at least one of the studied N proteins are marked in red, and unique peptides for this recombinant proteins are marked in bold red.

| MH <sup>+</sup> | Intensity (RU) | Mass deviation (ppm) | Range of residues | Sequence                   |
|-----------------|----------------|----------------------|-------------------|----------------------------|
| 587.32          | 135990.03      | 4.92                 | 117 - 121         | DLSPR                      |
| 663.33          | 19335.88       | 3.89                 | 264 - 270         | SAAEASK                    |
| 698.36          | 122556.76      | 1.98                 | 158 - 163         | DHIGTR                     |
| 711.33          | 27967.01       | 2.6                  | 308 - 313         | QGTDYK                     |
| 746.38          | 77014.8        | 1.9                  | 370 - 375         | HIDAYK                     |
| 749.36          | 177458.24      | 2                    | 192 - 199         | GSQASSR                    |
| 831.46          | 108199.36      | 1.08                 | 241 - 247         | LNQLESK                    |
| 846.48          | 99291.25       | 0.1                  | 76 - 82           | <b>EGLKFPR</b>             |
| 862.44          | 25509.04       | -1.44                | 115 - 121         | MKDLSPR 1: Oxidation (M)   |
| 886.41          | 756710.07      | 4.72                 | 184 - 191         | GFYAEGSR                   |
| 916.48          | 287194.01      | 2.08                 | 376 - 383         | TFPPTEPK                   |
| 942.56          | 85270.98       | 1.59                 | 362 - 369         | DQVILLNK                   |
| 977.51          | 10530.36       | -13.02               | 108 - 116         | IRGGDGKMK 8: Oxidation (M) |
| 1091.54         | 112672.57      | -0.66                | 353 - 361         | LDDKDPNFK                  |
| 1126.57         | 715453.11      | 2.1                  | 281 - 290         | AYNVTQAFGR                 |



|                |                  |              |                  |                                                                |
|----------------|------------------|--------------|------------------|----------------------------------------------------------------|
| <b>1148.58</b> | <b>226752.4</b>  | <b>-9.83</b> | <b>390 - 399</b> | <b>AYETQALPQK</b>                                              |
| 1202.61        | 186911.59        | -0.82        | 252 - 262        | GQQQQGQTVTK                                                    |
| <b>1276.68</b> | <b>20324.61</b>  | <b>-5.59</b> | <b>389 - 399</b> | <b>KAYETQALPQK</b>                                             |
| <b>1349.61</b> | <b>50180.87</b>  | <b>-2</b>    | <b>210 - 223</b> | <b>NSTPGSSMGTSPAR</b>                                          |
| <b>1365.6</b>  | <b>97730.22</b>  | <b>-4.01</b> | <b>210 - 223</b> | <b>NSTPGSSMGTSPAR 8: Oxidation (M)</b>                         |
| 1671.87        | 79458.02         | -3.37        | 224 - 240        | MAGNGGDAALALLLLDR 4: Deamidated (NQ)                           |
| 1684.88        | 266414.18        | 2.92         | 277 - 291        | TATKAYNVTQAFGR 7: Deamidated (NQ)                              |
| 1687.86        | 255134.92        | -4.31        | 224 - 240        | MAGNGGDAALALLLLDR 1: Oxidation (M) 4: Deamidated (NQ)          |
| 1788.85        | 283129.9         | -0.66        | 292 - 307        | GPEQTQGNFGDQELIR                                               |
| <b>1810.83</b> | <b>11259.8</b>   | <b>15.18</b> | <b>206 - 223</b> | <b>NSSRNSTPGSSMGTSPAR 1: Deamidated (NQ) 12: Oxidation (M)</b> |
| <b>1823.82</b> | <b>53543</b>     | <b>0.15</b>  | <b>29 - 46</b>   | <b>ITFGGPSDSTGSNQNGER</b>                                      |
| <b>1824.8</b>  | <b>399973.72</b> | <b>-0.52</b> | <b>29 - 46</b>   | <b>ITFGGPSDSTGSNQNGER 13: Deamidated (NQ)</b>                  |
| 1861.95        | 61168.59         | -4.54        | 403 - 419        | QQTVTLLPAADLDDFSK                                              |
| 1944.95        | 441339.68        | -0.78        | 291 - 307        | RGPEQTQGNFGDQELIR                                              |
| 1990.05        | 31220.51         | -1.16        | 402 - 419        | KQQTVTLLPAADLDDFSK                                             |
| 2015.08        | 66803.83         | -1.51        | 353 - 369        | LDDKDPNFKDQVILLNK                                              |
| 2025.03        | 12975.21         | -1.71        | 334 - 352        | IGMEVTPSGTWLTYTGAIK                                            |
| 2041.03        | 28249.29         | -1.55        | 334 - 352        | IGMEVTPSGTWLTYTGAIK 3: Oxidation (M)                           |
| 2060.15        | 71424.99         | -2.3         | 164 - 183        | NPANNAIAIVLQLPQGTTLPK                                          |
| <b>2181.03</b> | <b>323546.63</b> | <b>4.97</b>  | <b>83 - 102</b>  | <b>GQGVPIINTNSSPDDQIGYYR</b>                                   |
| 2658.15        | 1205             | 13.92        | 2 - 24           | GSSHHHHHHSQDQMSDNGPQNQR                                        |
| 2674.13        | 2832             | 8.77         | 2 - 24           | GSSHHHHHHSQDQMSDNGPQNQR 14: Oxidation (M)                      |

**Table S6** - Detected ions (MH<sup>+</sup>) and matched peptides from the recombinant N protein (B.1.1.529) according to peptide mapping. The range of residues corresponding to the peptides, the relative intensity of the ion, the mass deviation (in parts per million, ppm), as well as possible peptide modifications (oxidation and deamidation) are indicated. Peptides that differ in at least one of the studied N proteins are marked in red, and unique peptides for this recombinant proteins are marked in bold red.

| MH <sup>+</sup> | Intensity (RU) | Mass deviation (ppm) | Range of residues | Sequence                |
|-----------------|----------------|----------------------|-------------------|-------------------------|
| 531.29          | 26371.43       | -3.03                | 216 - 220         | TSPAR                   |
| 587.31          | 40219          | -1.59                | 114 - 118         | DLSPR                   |
| 663.33          | 5896.69        | -1.44                | 261 - 267         | SAAEASK                 |
| 698.36          | 38888.37       | -2.08                | 155 - 160         | DHIGTR                  |
| 711.33          | 8824.8         | -3.23                | 305 - 310         | QGTDYK                  |
| 746.38          | 21175.67       | -2.63                | 367 - 372         | HIDAYK                  |
| 749.35          | 59926.69       | -0.86                | 189 - 196         | GSQASSR                 |
| <b>777.37</b>   | <b>4846</b>    | <b>-3.1</b>          | <b>207 - 214</b>  | <b>NSTPGSSK</b>         |
| 831.45          | 31441.7        | -2.71                | 238 - 244         | LNQLESK                 |
| 862.44          | 7317.23        | -3.59                | 112 - 118         | MKDLSR 1: Oxidation (M) |
| 886.41          | 363197.76      | 2.38                 | 181 - 188         | GFYAEGSR                |

|         |           |        |           |                                                              |
|---------|-----------|--------|-----------|--------------------------------------------------------------|
| 904.49  | 101311.12 | -0.54  | 73 - 79   | EDLKFP                                                       |
| 916.48  | 112029.82 | -1.69  | 373 - 380 | TFPPTEPK                                                     |
| 942.56  | 32096.42  | -1.03  | 359 - 366 | DQVILLNK                                                     |
| 977.51  | 6207.8    | -14.97 | 105 - 113 | IRGGDGKMK 8: Oxidation (M)                                   |
| 1091.54 | 70287.24  | -1.49  | 350 - 358 | LDDKDPNFK                                                    |
| 1126.57 | 363043.29 | 2.15   | 278 - 287 | AYNVTQAFGR                                                   |
| 1128.57 | 124535.85 | 5.55   | 387 - 396 | ADETQALPQR                                                   |
| 1202.61 | 56376.21  | -2.56  | 249 - 259 | GQQQQGQTVTK                                                  |
| 1256.66 | 95743.6   | 1.25   | 386 - 396 | KADETQALPQR                                                  |
| 1607.8  | 7144.16   | 17.56  | 245 - 259 | MSGKGQQQQGQTVTK 6: Deamidated (NQ) 7: Deamidated (NQ)        |
| 1671.87 | 5943.5    | -2.39  | 221 - 237 | MAGNGGDAALALLLLDR 4: Deamidated (NQ)                         |
| 1684.88 | 18260.63  | -3.3   | 139 - 154 | DGIIWVATEGALNTPK                                             |
| 1687.87 | 55851.77  | -0.67  | 221 - 237 | MAGNGGDAALALLLLDR 1: Oxidation (M) 4: Deamidated (NQ)        |
| 1788.86 | 213813.42 | 2.74   | 289 - 304 | GPEQTQGNFGDQELIR                                             |
| 1824.81 | 5665.32   | 3.03   | 29 - 47   | ITFGGSPDSTGSNQNGGAR 13: Deamidated (NQ) 14: Deamidated (NQ)  |
| 1861.95 | 21329.44  | -3.79  | 400 - 416 | QQTVTLTPAADLDDFSK                                            |
| 1944.96 | 278052.48 | 3.29   | 288 - 304 | RGPEQTQGNFGDQELIR                                            |
| 1990.05 | 9373.06   | -0.08  | 399 - 416 | KQQTVTLTPAADLDDFSK                                           |
| 2015.09 | 38544.41  | 2.13   | 350 - 366 | LDDKDPNFKDQVILLNK                                            |
| 2025.04 | 14201.32  | 0.26   | 331 - 349 | IGMEVTPSGTWLTYTGAIK                                          |
| 2041.03 | 38807.02  | -0.83  | 331 - 349 | IGMEVTPSGTWLTYTGAIK 3: Oxidation (M)                         |
| 2060.15 | 32199.1   | -0.24  | 161 - 180 | NPANNAAIVLQLPQGTTLPK                                         |
| 2181.04 | 150735.97 | 9.55   | 80 - 99   | GQGVPIINTNPPDDQIGYYR                                         |
| 2267.1  | 35118.93  | 7.33   | 119 - 138 | WYFYLLGTGPEAGLPYGANK                                         |
| 2320.02 | 3520.32   | 8.72   | 417 - 436 | QLQQSMSSADSTQAHHHHHH 6: Oxidation (M)                        |
| 2325.21 | 5091.31   | 17.86  | 52 - 72   | RPQGLPNNTASWFTALTQHGK 3: Deamidated (NQ)                     |
| 2356.21 | 8503.4    | -14.58 | 215 - 237 | RTSPARMAGNGGDAALALLLLDR 7: Oxidation (M) 10: Deamidated (NQ) |
| 2658.16 | 1069      | 18.2   | 2 - 24    | GSSHHHHHHSQDQMSDNGPQNQR                                      |
| 2674.16 | 1927      | 19.57  | 2 - 24    | GSSHHHHHHSQDQMSDNGPQNQR 14: Oxidation (M)                    |

**Table S7** - Detected ions (MH<sup>+</sup>) and matched peptides from the recombinant N protein (HCoV OC43) according to peptide mapping. The range of residues corresponding to the peptides, the relative intensity of the ion, the mass deviation (in parts per million, ppm), as well as possible peptide modifications (oxidation and deamidation) are indicated. Peptides that differ in at least one of the studied N proteins are marked in red, and unique peptides for this recombinant proteins are marked in bold red.

| MH <sup>+</sup> | Intensity (RU) | Mass deviation (ppm) | Range of residues | Matched peptide |
|-----------------|----------------|----------------------|-------------------|-----------------|
| 564.26          | 4639.77        | -28.41               | 22 - 26           | QSSSR           |
| 573.35          | 4359.95        | -25.83               | 343 - 347         | LELAK           |

|         |           |        |           |                                                                                |
|---------|-----------|--------|-----------|--------------------------------------------------------------------------------|
| 591.28  | 6763.99   | -9.95  | 27 - 32   | ASSGNR                                                                         |
| 599.35  | 6470.51   | -26.62 | 56 - 60   | RAQPK                                                                          |
| 616.34  | 5974.3    | -6.71  | 432 - 436 | VQQNK                                                                          |
| 617.34  | 32674.01  | -2.34  | 49 - 53   | NVQTR                                                                          |
| 626.4   | 73147.01  | 7.78   | 132 - 136 | QLLPR                                                                          |
| 631.31  | 9566.58   | -10.94 | 208 - 213 | SAPNSR                                                                         |
| 635.3   | 6551.06   | -13.28 | 222 - 228 | ASSAGSR                                                                        |
| 689.38  | 5090.85   | -3.54  | 33 - 39   | SGNGILK 3: Deamidated (NQ)                                                     |
| 693.37  | 6743      | 5.34   | 367 - 372 | YNGAIR                                                                         |
| 694.37  | 27035     | 22.8   | 367 - 372 | YNGAIR 2: Deamidated (NQ)                                                      |
| 740.48  | 37929.29  | 7.79   | 280 - 285 | ILNKPR                                                                         |
| 744.36  | 344721.45 | 19.17  | 113 - 117 | GYWYR                                                                          |
| 761.37  | 31912.34  | 19.78  | 125 - 131 | TADGNQR                                                                        |
| 794.42  | 16695.59  | 18.86  | 361 - 366 | DVYELR                                                                         |
| 1104.52 | 417839.94 | 14.61  | 40 - 48   | WADQSDQVR                                                                      |
| 1115.62 | 10261.13  | 12.64  | 261 - 270 | DATKPQQVTK                                                                     |
| 1142.48 | 13506.72  | -13.49 | 293 - 302 | QCTVQQCFGK 1: Deamidated (NQ)                                                  |
| 1187.56 | 6595.45   | 8.3    | 179 - 189 | DPSSDEAIPTR                                                                    |
| 1231.7  | 15975.26  | 21     | 439 - 449 | ELTAEDISLLK                                                                    |
| 1348.65 | 9673.61   | 14.84  | 304 - 316 | GPNQNFSGGEMLK                                                                  |
| 1364.65 | 5895.44   | 17.36  | 304 - 316 | GPNQNFSGGEMLK 11: Oxidation (M)                                                |
| 1425.71 | 3826.23   | 10.57  | 348 - 360 | VQNLSGNPDEPQK                                                                  |
| 1475.75 | 24007.45  | 26.79  | 373 - 385 | FDSTLSGFETIMK                                                                  |
| 1491.75 | 13844.14  | 32.7   | 373 - 385 | FDSTLSGFETIMK 12: Oxidation (M)                                                |
| 1504.76 | 39343.8   | 15.37  | 303 - 316 | RGPNQNFSGGEMLK                                                                 |
| 1520.76 | 20933.59  | 24.5   | 303 - 316 | RGPNQNFSGGEMLK 12: Oxidation (M)                                               |
| 1542.77 | 7187.07   | 20.36  | 415 - 429 | NGQGENDNISVAVPK 1: Deamidated (NQ)                                             |
| 1602.82 | 12880.19  | 27.65  | 137 - 149 | WYFYLLGTGPHAK                                                                  |
| 1938.04 | 33934.73  | -2.64  | 261 - 277 | DATKPQQVTKHTAKEVR 6: Deamidated (NQ)                                           |
| 2115.17 | 1108.38   | 34.72  | 237 - 257 | TPTSGVTPDMADQIASLVLAKE                                                         |
| 2201.13 | 6827.92   | 21.93  | 348 - 366 | VQNLSGNPDEPQKDVYELR                                                            |
| 2272.21 | 1618.75   | 27.64  | 91 - 112  | EFEFVEGQGVPIAPGVPATEAK                                                         |
| 2380.06 | 707       | 19.36  | 450 - 468 | KMDEPYTEDTSEIHSHHHHH                                                           |
| 2457.3  | 8076.09   | 13.44  | 89 - 112  | GKEFEFVEGQGVPIAPGVPATEAK                                                       |
| 2710.4  | 3728.05   | 5.36   | 317 - 342 | LGTSDPQFPILAEAPTAGAFFFGSR                                                      |
| 2806.32 | 2412.79   | 4.64   | 386 - 409 | VLNENLNAYQQQDGMMNMSPKPQR                                                       |
| 2822.33 | 1805.77   | 10.24  | 386 - 409 | VLNENLNAYQQQDGMMNMSPKPQR 15: Oxidation (M)                                     |
| 2838.35 | 2526.04   | 18.5   | 386 - 409 | VLNENLNAYQQQDGMMNMSPKPQR 15: Oxidation (M) 16: Oxidation (M)                   |
| 2854.34 | 2133.97   | 17.73  | 386 - 409 | VLNENLNAYQQQDGMMNMSPKPQR 15: Oxidation (M) 16: Oxidation (M) 18: Oxidation (M) |
| 3106.59 | 2833.05   | 24.96  | 179 - 207 | DPSSDEAIPTRFPPGTVPQGYIEGSGR                                                    |

---

|         |         |       |           |                               |
|---------|---------|-------|-----------|-------------------------------|
| 3197.56 | 8097.49 | 30.52 | 150 - 178 | DQYGTDIDGVYWVASNQADVNTPADIVDR |
|---------|---------|-------|-----------|-------------------------------|

## References

1. Kozlovskaya, L.; Piniaeva, A.; Ignatyev, G.; Selivanov, A.; Shishova, A.; Kovpak, A.; Gordeychuk, I.; Ivin, Y.; Berestovskaya, A.; Prokhortchouk, E.; et al. Isolation and phylogenetic analysis of SARS-CoV-2 variants collected in Russia during the COVID-19 outbreak. *International journal of infectious diseases : IJID : official publication of the International Society for Infectious Diseases* **2020**, 99, 40-46, doi:10.1016/j.ijid.2020.07.024.
